# Supplementary material for: Facile fabrication of self-supporting porous CuMoO4@Co3O4nanosheets as a bifunctional electrocatalyst for efficient overall water splitting
Source: Royal Society of Chemistry journal article supplement (doi:10.1039/d2dt01613c), 2022-01-01
Supplement: d2dt01613c1.pdf [file d2dt01613c1.pdf]

Supplementary Information for

**Facile fabrication of self-supporting porous nanosheets  
CuMoO<sub>4</sub>@Co<sub>3</sub>O<sub>4</sub> as bifunctional electrocatalyst for efficient overall  
water splitting**

Fei Fei Dai <sup>a</sup>, Yan Xue Xue <sup>a</sup>, Ding Ling Gao <sup>a</sup>, Yu Xiang Liu <sup>a</sup>, Jian Hua Chen <sup>a, b, \*</sup>, Qiao Jing Lin

<sup>a</sup>, Wei Wei Lin <sup>a</sup>, Qian Yang <sup>a, b, \*</sup>

<sup>a</sup> College of Chemistry, Chemical Engineering and Environment, Minnan Normal University,

Zhangzhou 363000, PR China.

<sup>b</sup>Fujian Province University Key Laboratory of Modern Analytical Science and Separation Techno

logy, Minnan Normal University, Zhangzhou 363000, PR China.

---

\*Corresponding author:

E-mail addresses and contact details: jhchen73@126.com (J.H.Chen); Tel: +86 0596 2591445; Fax: +86 0596 2520035(J.H. Chen); yangqian0417@163.com (Q.Yang).

## 1. Chemicals

The nickel foam was acquired from Longshengbao (Kunshan, China). Cobalt (II) nitrate hexahydrate  $[\text{Co}(\text{NO}_3)_2 \cdot 6\text{H}_2\text{O}]$ , Pt-C (20 wt%) and cupric (II) nitrate hydrate  $[\text{Cu}(\text{NO}_3)_2 \cdot 3\text{H}_2\text{O}]$  were purchased from Mackun (Shanghai, China). Ammonium molybdate tetrahydrate  $[(\text{NH}_4)_6\text{Mo}_7\text{O}_{24} \cdot 4\text{H}_2\text{O}]$ , N, N-Dimethylformamide [DMF,  $(\text{CH}_3)_2\text{NC}(\text{O})\text{H}$ ], potassium hydroxide (KOH), concentrated hydrochloric acid (HCl) and ethanol ( $\text{C}_2\text{H}_5\text{OH}$ ) were purchased from Xilong Scientific. Iridium oxide powder ( $\text{IrO}_2$ , 99%) and Nafion were bought from Aladdin (Shanghai, China).

## 2. Materials characterization

The surface morphology, structure and chemical composition of the samples were determined by a scanning electron microscope (SEM, TESCAN MIRA-4) equipped with an energy-dispersive X-ray (EDX) spectroscopy. The nanostructure and crystallinity of the samples were characterized by transmission electron microscopy (TEM, FEI Tecnai G2 F20) and high-resolution transmission electron microscopy (HRTEM). The crystal phase and phase composition of samples were conducted by X-ray diffractometer (XRD, D8 Advance-X) with  $\text{Cu K}\alpha$  radiation and X-ray photoelectron spectroscopy (XPS, Thermo Scientific K-Alpha). The permeability between the electrode and electrolyte of the sample was characterized by a dynamic / static contact angle tester (SL200B).  $\text{N}_2$  adsorption experiments were carried out on Mike ASAP2460 instrument. The metal concentration in the electrolyte after reaction was detected by inductively coupled plasma mass spectrometry (ICP-MS, Agilent 7500cx). Raman spectroscopy (Raman, LabRAM HR Evolution, France) was used to further investigate the molecular vibration.

### 3. Electrochemical tests

The electrochemical performance test was carried out on the CHI660E electrochemical workstation of Shanghai Chenhua Instrument Co., Ltd. Electrochemical measurements were carried out in a classic three-electrode setup with our self-made NF substrate electrode ( $1 \times 1 \text{ cm}^2$ ) as the working electrode, a graphite rod as the counter electrode, and a standard Hg/HgO ( $1 \text{ mol L}^{-1} \text{ NaOH}$ ) electrode as the reference electrode. All measurements were performed in KOH ( $\text{pH} = 14$ ) electrolyte with a concentration of  $1 \text{ mol L}^{-1}$ . In the test process of linear cyclic voltammetry (LSV), the polarization curves of OER and HER were obtained at the scanning rates of  $2 \text{ mV s}^{-1}$  and  $5 \text{ mV s}^{-1}$ , respectively. The potential obtained from the test needs to be converted to reversible hydrogen. Formula  $E \text{ vs. RHE} = E \text{ vs. Hg / HgO} + 0.098 + 0.059 \text{ pH}$  is used to calibrate all potential as reversible hydrogen electrode (RHE). The relationship between overpotential ( $\eta$ ) and current density logarithm ( $\log j$ ) can be drawn by the test results of LSV curve with 100% IR compensation and the corresponding Tafel curve can be obtained. Electrochemical impedance spectroscopy (EIS) was measured in the frequency range of  $10 \text{ kHz} \sim 0.01 \text{ Hz}$  and the amplitude of  $5 \text{ mV}$ . The stability of  $\text{CuMoO}_4@ \text{Co}_3\text{O}_4/\text{NF}$  electrode was tested by cyclic voltammetry (CV) and chronopotentiometry (P-T), respectively and the scanning rate of cyclic voltammetry (CV) was  $50 \text{ mV s}^{-1}$ . ECSA of electrocatalysts were evaluated by measurement of cyclic voltammogram (CV) curves in the potential range of  $0.924 \text{ V} \sim 1.024 \text{ V}$  (vs RHE) at different scan rates. According to the linear slope of sweep rate versus current density, their double-layer capacitance ( $C_{dl}$ ) values were estimated. A two-electrode system was employed to assess the overall water electrolysis performance in  $1 \text{ mol L}^{-1}$  (M) KOH, and its stability was measured at a constant current density at  $10 \text{ mA cm}^{-2}$  for 120 h. In the presence of the heterogeneous catalyst, the turnover frequency (TOF) is calculated using (Eq.

(S1, S2))<sup>1</sup>:

$$\text{TOF (H}_2 \text{ for a heterogeneous catalyst)} = j / (2 \times F \times m) \quad (\text{S1})$$

$$\text{TOF (O}_2 \text{ for a heterogeneous catalyst)} = j / (4 \times F \times m) \quad (\text{S2})$$

where  $j$  represents the current density at an overpotential,  $F$  represents the Faraday constant,  $m$  is the number of moles of metal on the electrode.

The Faradaic efficiency (FE) measured by drainage method at 100 mA cm<sup>-2</sup> for 110 min and calculated by formula (Eq. (S3, S4)):

$$\text{FE} = V_{\text{measured}} / V_{\text{calculated}} \quad (\text{S3})$$

$$V_{\text{calculated}} = (V_m \times Q) / (n \times F) \quad (\text{S4})$$

where  $V_{\text{measured}}$  represents the actual collected gas production,  $V_{\text{calculated}}$  represents the theoretical gas production,  $V_m$  is the gas molar volume at room temperature and atmospheric pressure,  $Q$  is the total power consumption,  $n$  is the electron transfer number, and  $F$  is the Faraday constant.

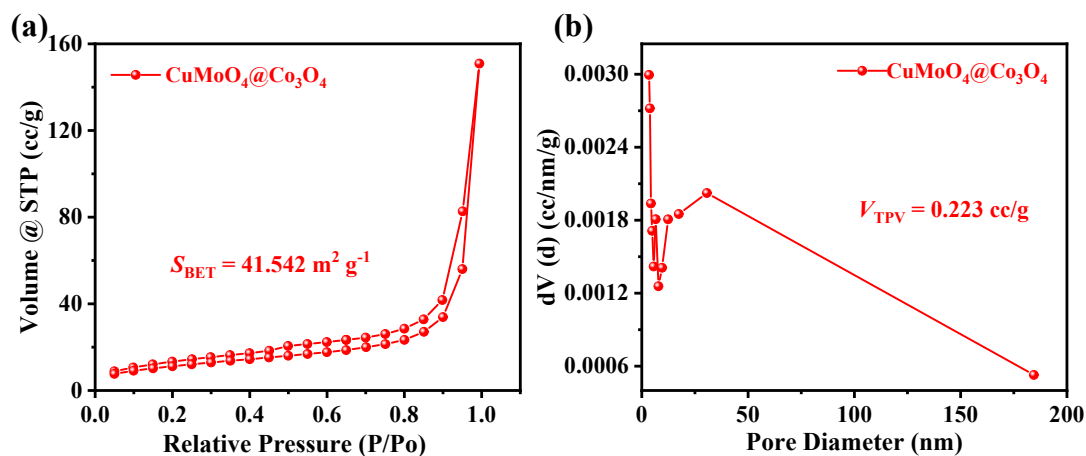

**Fig. S1** (a) BET analysis and (b) Pore Distribution curve of CuMoO<sub>4</sub>@Co<sub>3</sub>O<sub>4</sub> catalyst.

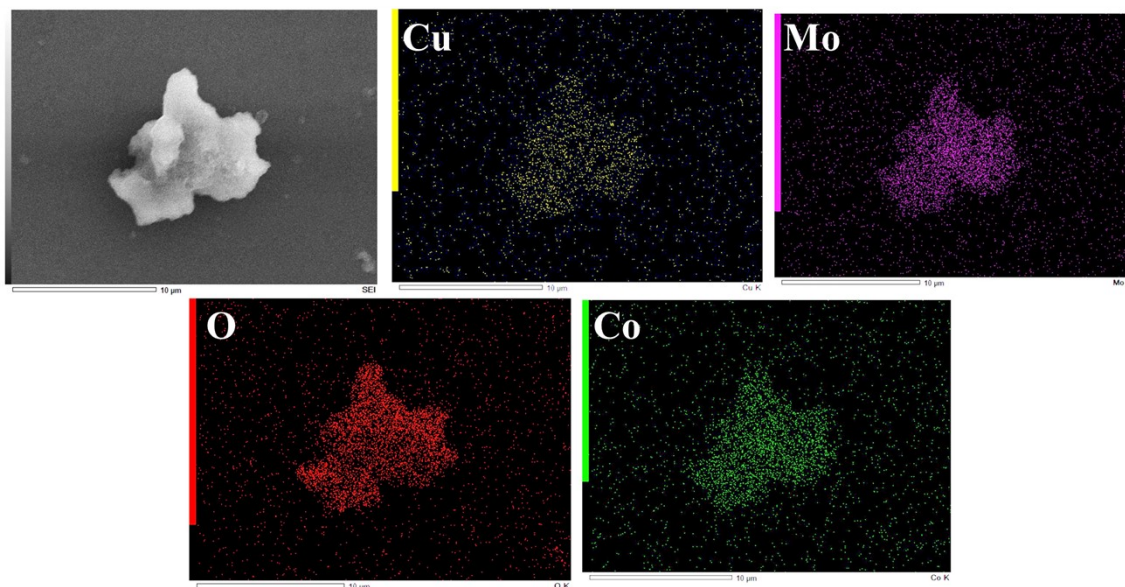

**Fig. S2** Elemental mapping images of Cu, Mo, O, and Co of  $\text{CuMoO}_4@\text{Co}_3\text{O}_4$  powders.

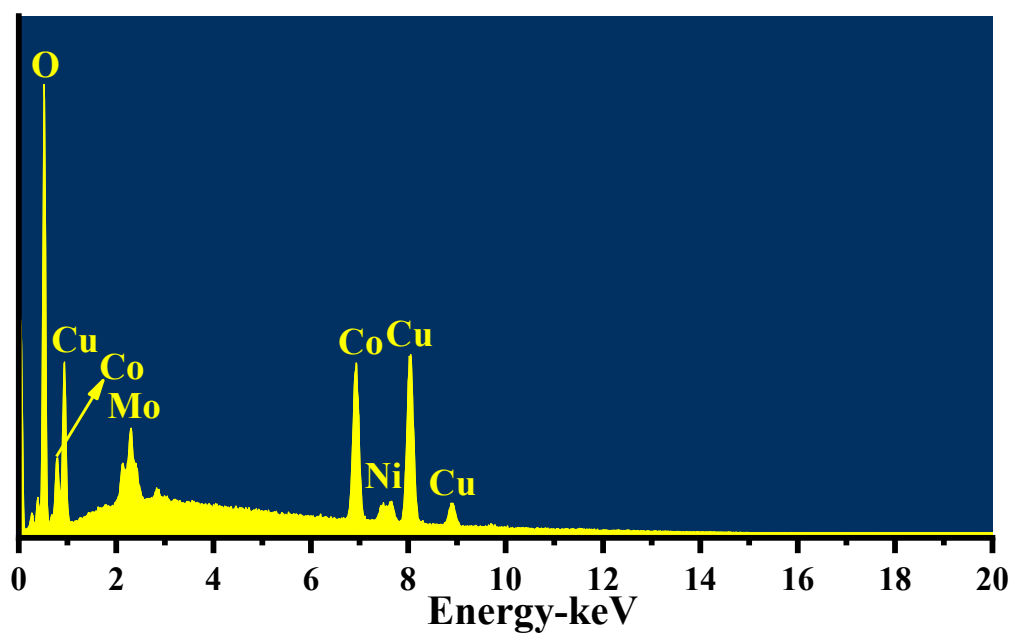

**Fig. S3** EDS spectra of  $\text{CuMoO}_4@\text{Co}_3\text{O}_4/\text{NF}$  catalyst.

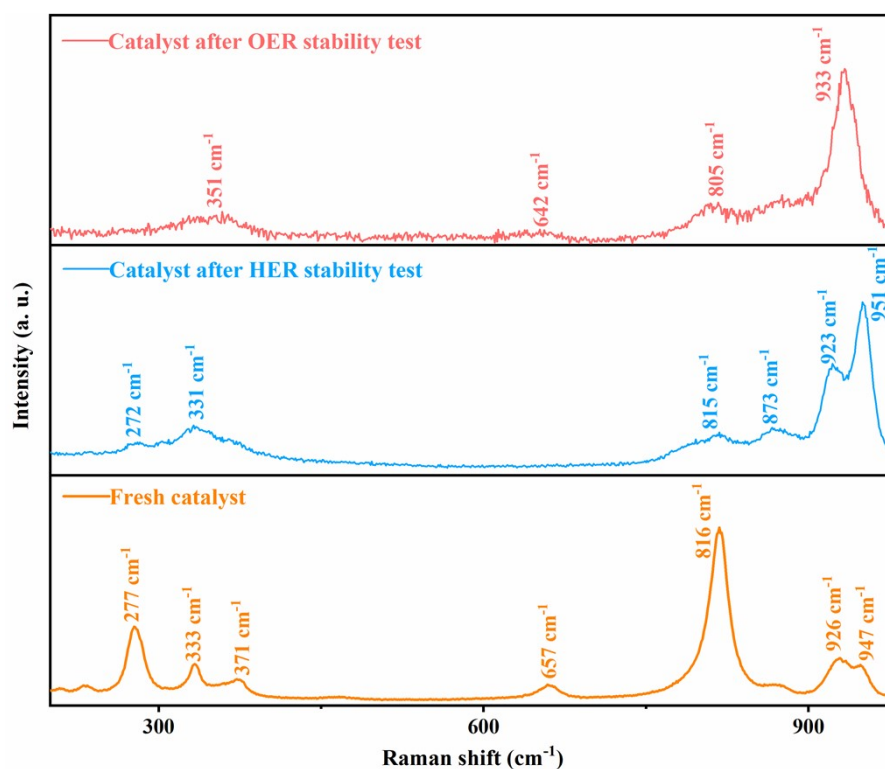

**Fig. S4** The Raman spectrum of fresh catalyst, catalyst after HER stability test and catalyst after OER stability test.

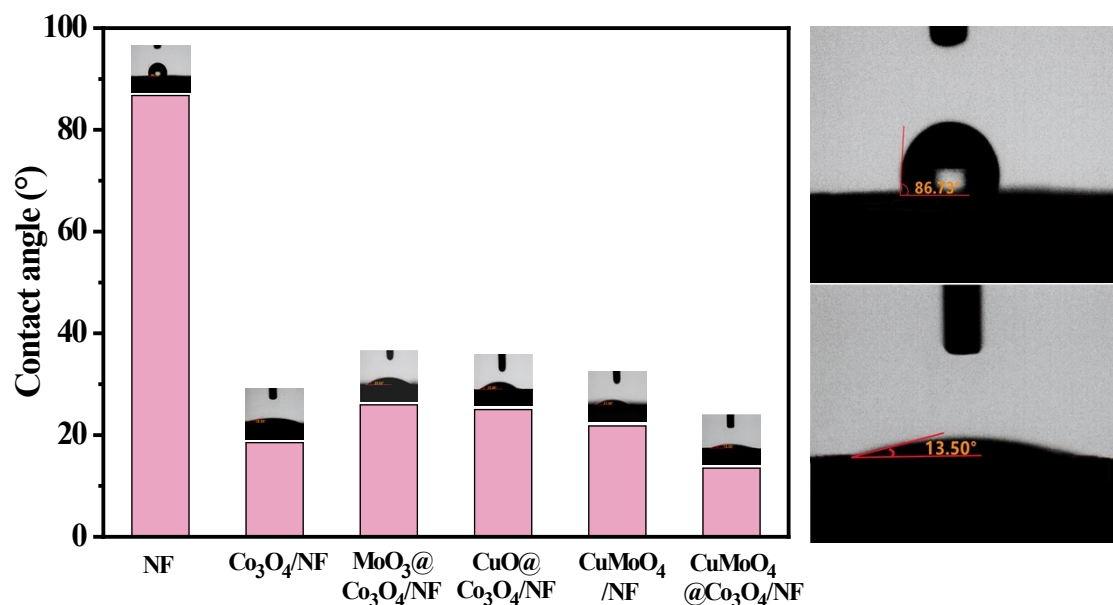

**Fig. S5** Contact angle measurements of NF, Co<sub>3</sub>O<sub>4</sub>/NF, MoO<sub>3</sub>@Co<sub>3</sub>O<sub>4</sub>/NF, CuO@Co<sub>3</sub>O<sub>4</sub>/NF, CuMoO<sub>4</sub>/NF, CuMoO<sub>4</sub>@Co<sub>3</sub>O<sub>4</sub>/NF.

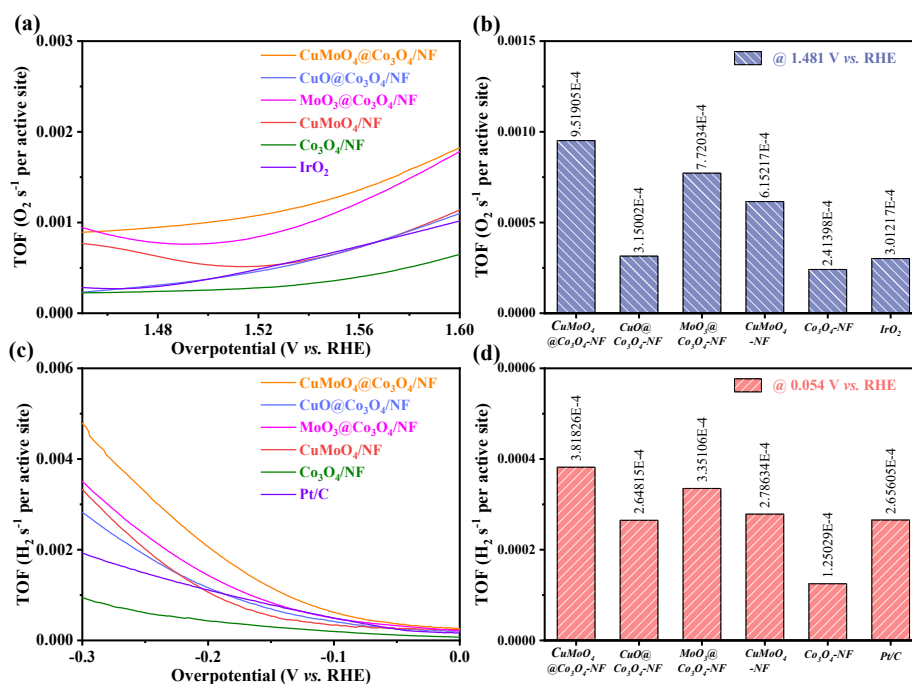

**Fig. S6** (a, b) TOF diagrams of OER Overpotential on IrO<sub>2</sub>, Co<sub>3</sub>O<sub>4</sub>/NF, MoO<sub>3</sub>@Co<sub>3</sub>O<sub>4</sub>/NF, CuO@Co<sub>3</sub>O<sub>4</sub>/NF, CuMoO<sub>4</sub>/NF and CuMoO<sub>4</sub>@Co<sub>3</sub>O<sub>4</sub>/NF electrodes. (c, d) TOF diagrams of HER Overpotential on Pt/C, Co<sub>3</sub>O<sub>4</sub>/NF, MoO<sub>3</sub>@Co<sub>3</sub>O<sub>4</sub>/NF, CuO@Co<sub>3</sub>O<sub>4</sub>/NF, CuMoO<sub>4</sub>/NF and CuMoO<sub>4</sub>@Co<sub>3</sub>O<sub>4</sub>/NF electrodes.

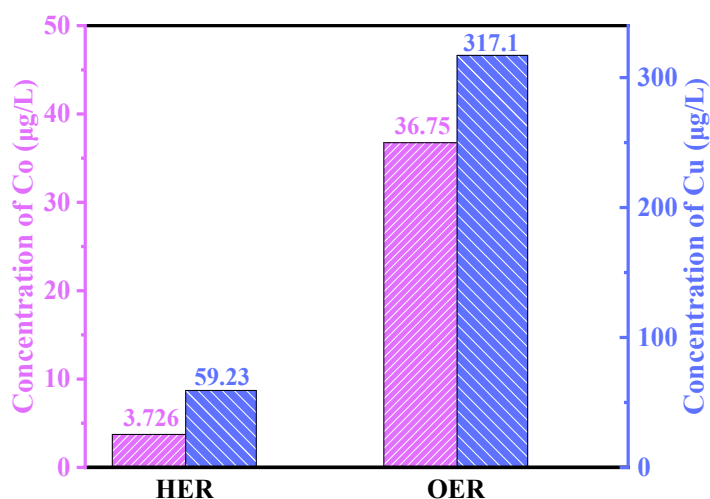

**Fig. S7** The contents of Cu and Co released by HER and OER in the electrolyte after 2000 cycles of CV measured by ICP-MS.

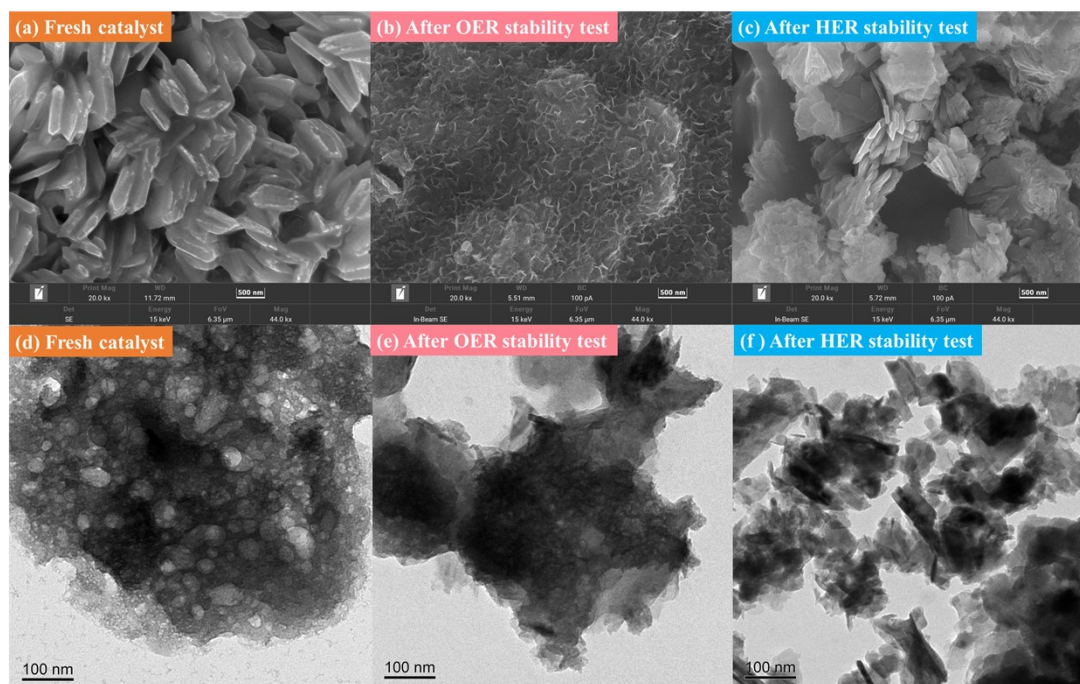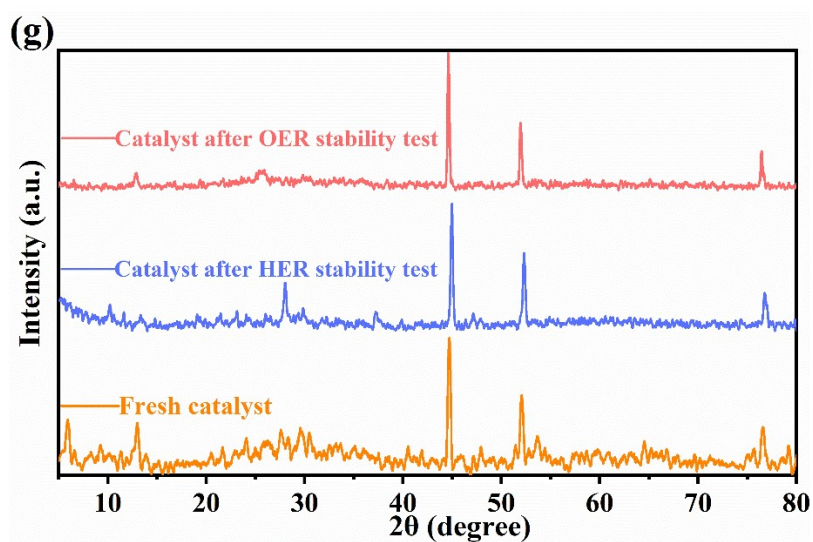

**Fig. S8** (a-c) SEM pictures: (a) Fresh catalyst, (b) Catalyst after OER stability, (c) Catalyst after HER stability. (d-f) TEM pictures: (d) Fresh catalyst, (e) Catalyst after OER stability, (f) Catalyst after HER stability. (g) XRD patterns of fresh catalyst, catalyst after HER stability test and catalyst after OER stability test.



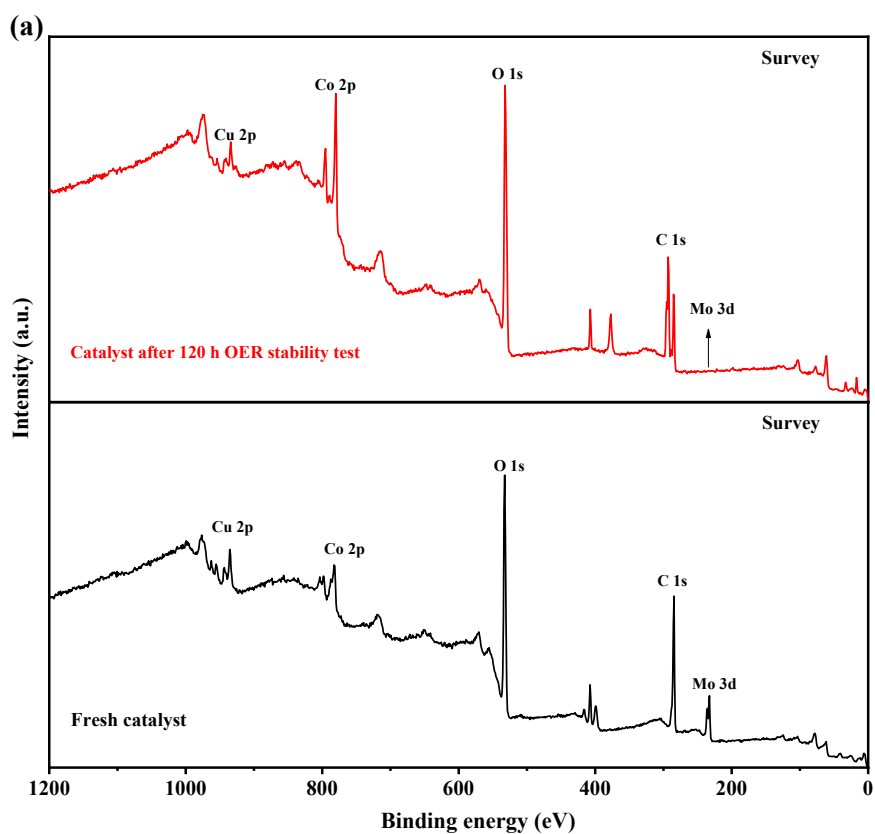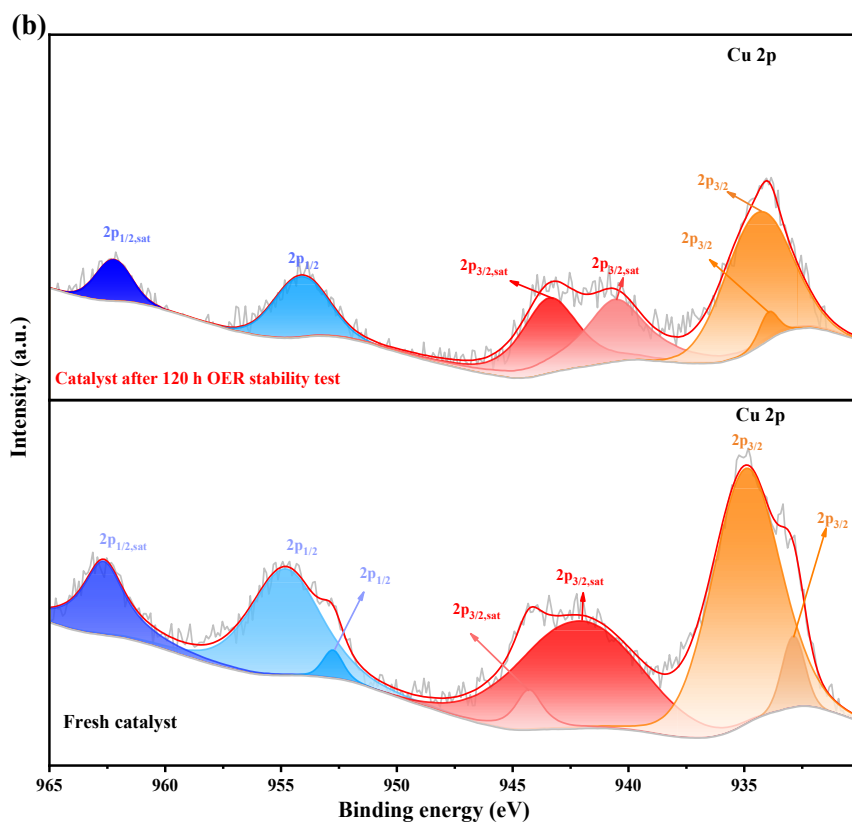

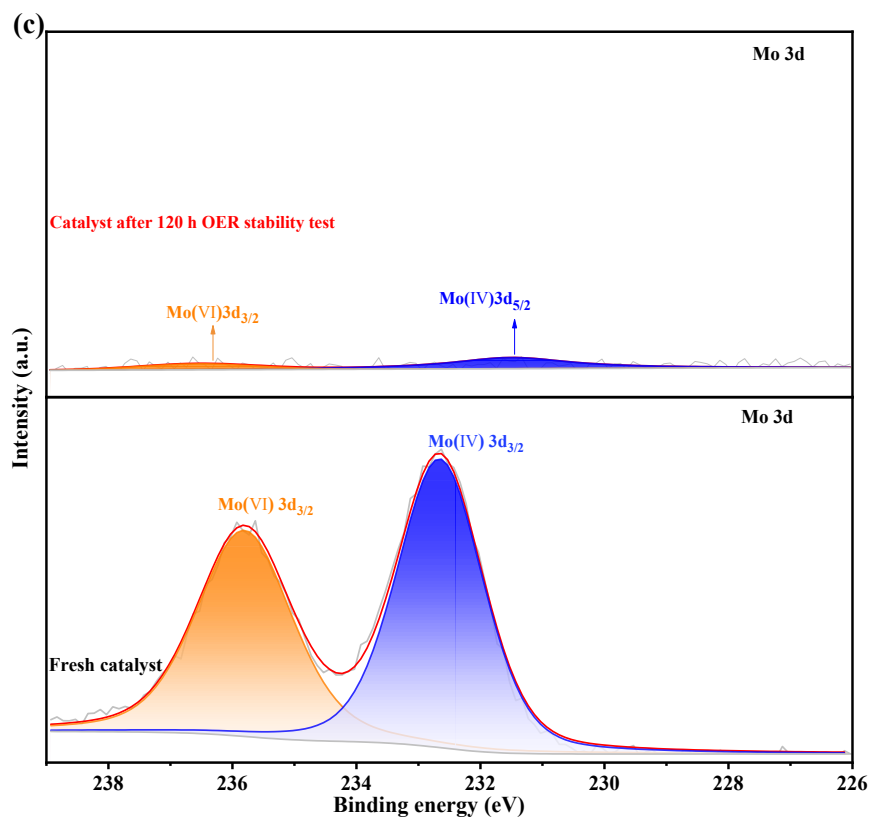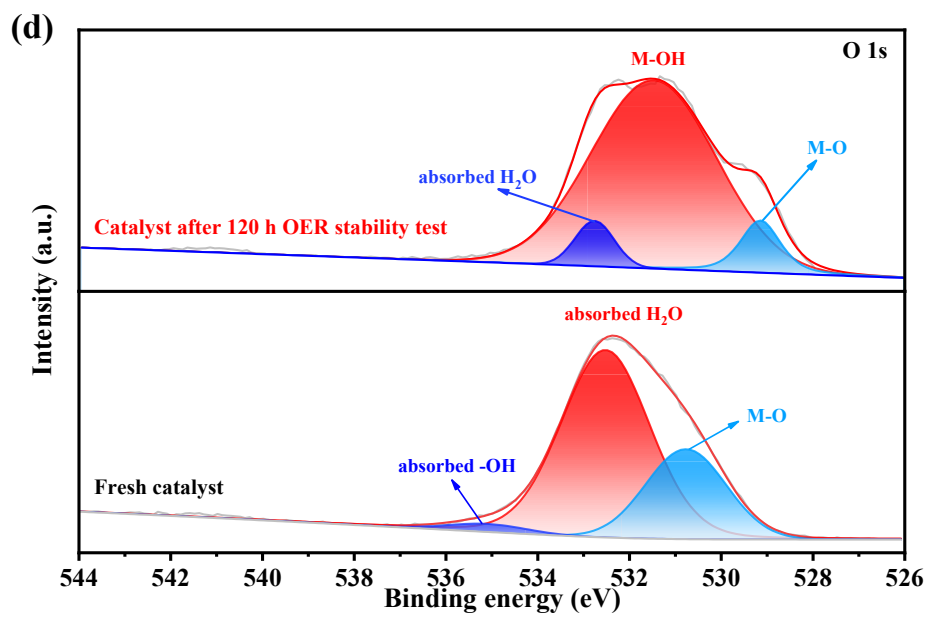

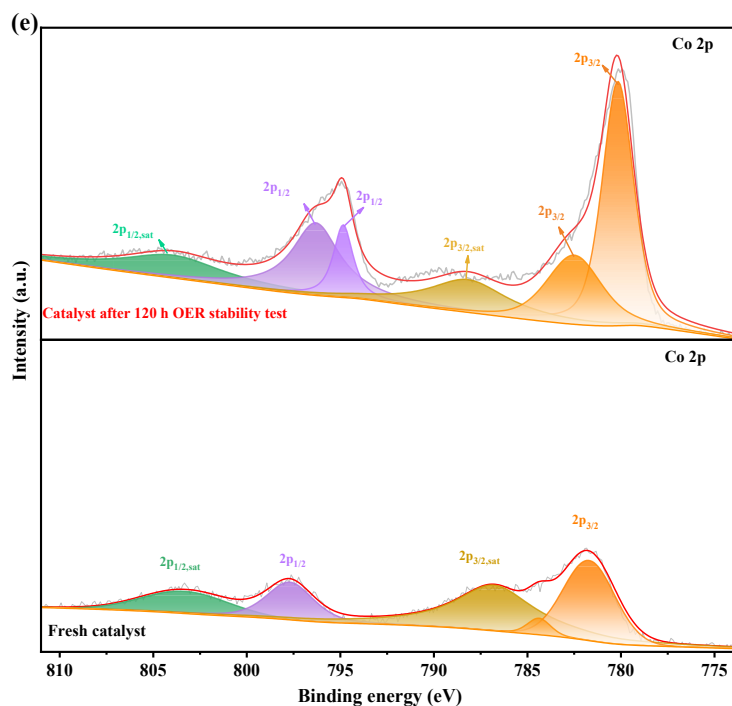

**Fig. S9** XPS spectra. High-resolution XPS of (a) XPS survey, and b-e high-resolution XPS of (b) Cu 2p, (c) Mo 3d, (d) O 1s, and (e) Co 2p of the  $\text{CuMoO}_4@\text{Co}_3\text{O}_4/\text{NF}$  catalyst after 120 h OER stability tests.

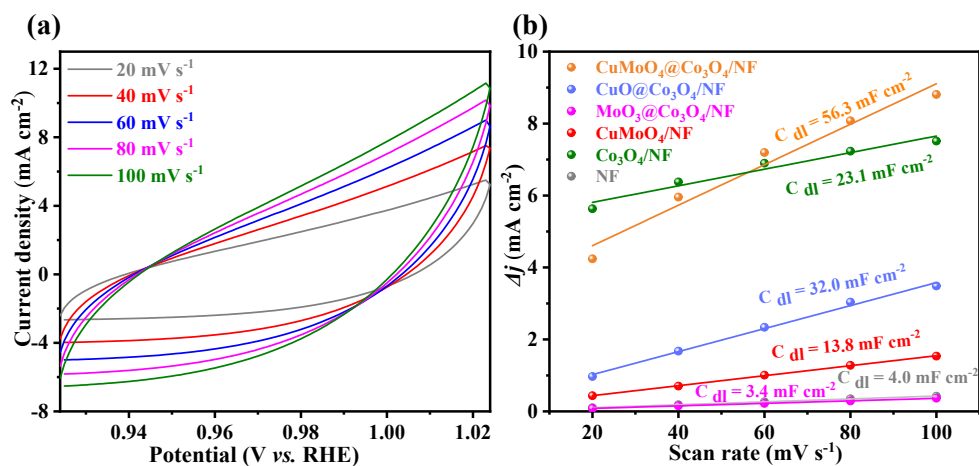

**Fig. S10** (a) CV curves for calculation of double-layer capacitance. (b) Calculation of double-layer capacitance. CV curves of  $\text{CuMoO}_4@\text{Co}_3\text{O}_4/\text{NF}$  at scan rates ranging from 20  $\text{mV s}^{-1}$  to 100  $\text{mV s}^{-1}$  with an interval point of 20  $\text{mV s}^{-1}$ . Linear fitting of the capacitive currents of the catalysts vs. the scan rates to calculate the double-layer capacitance ( $C_{dl}$ ).

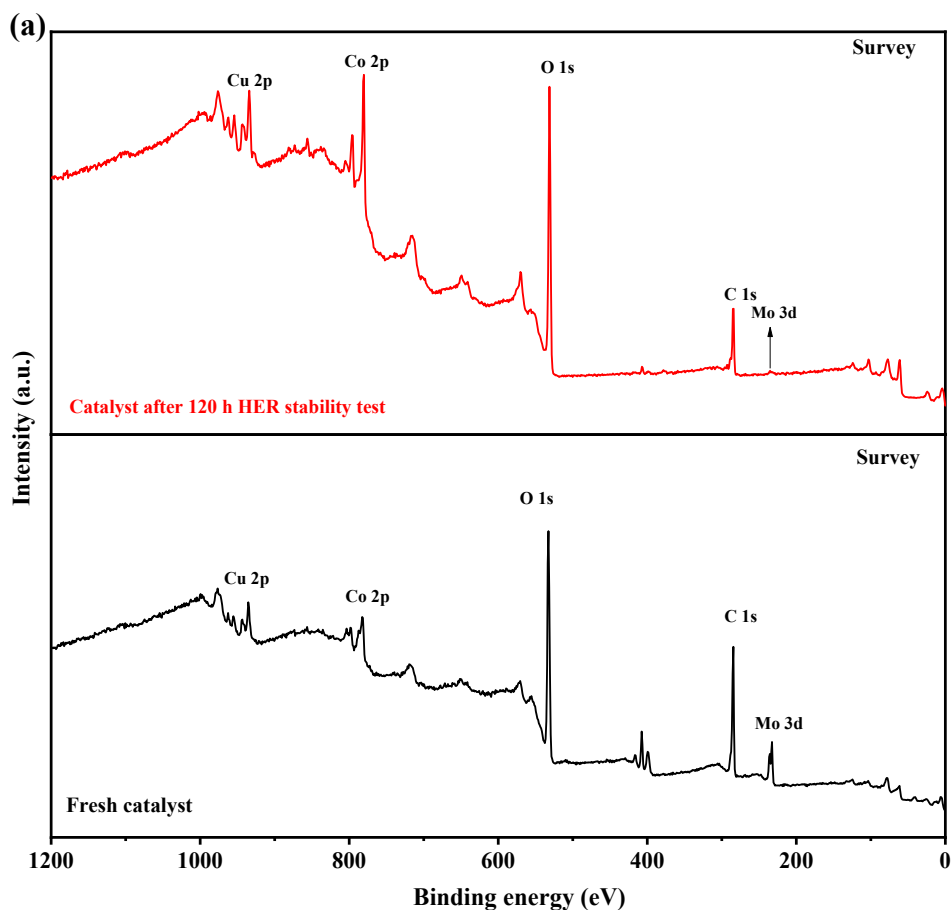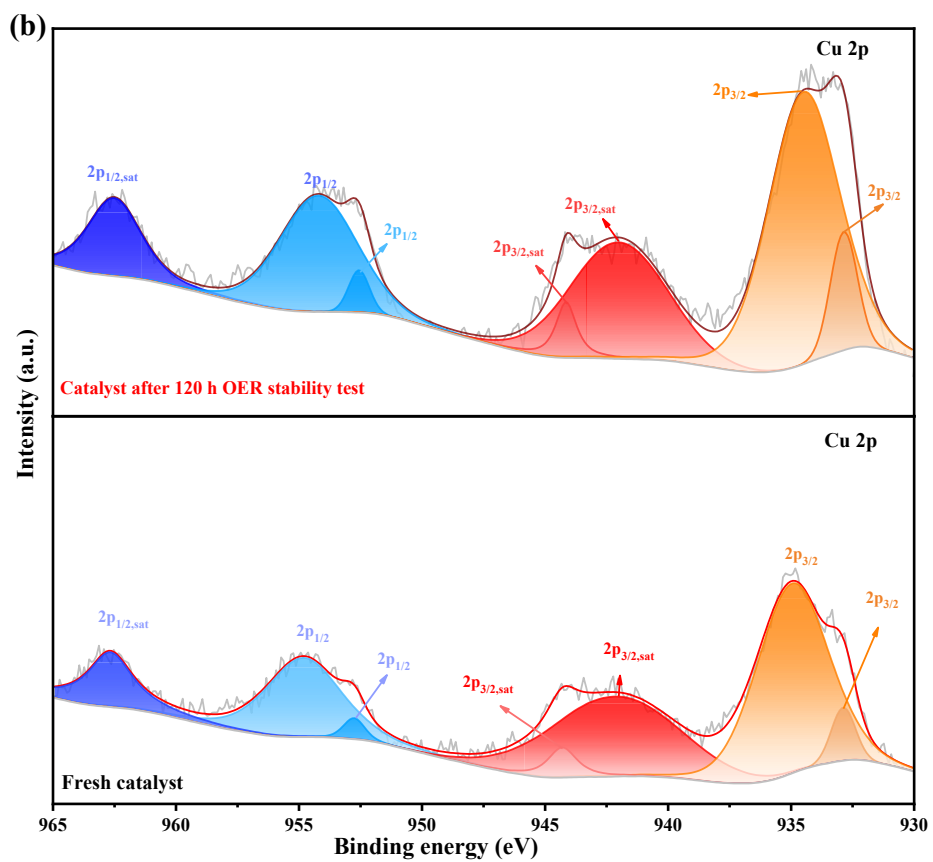

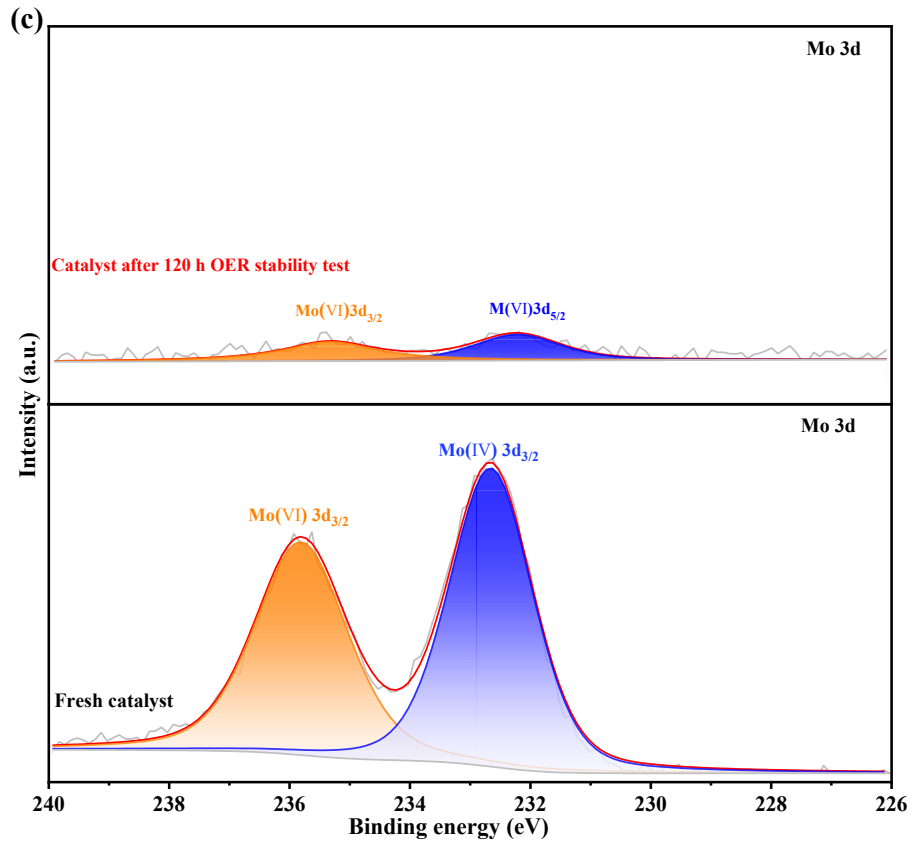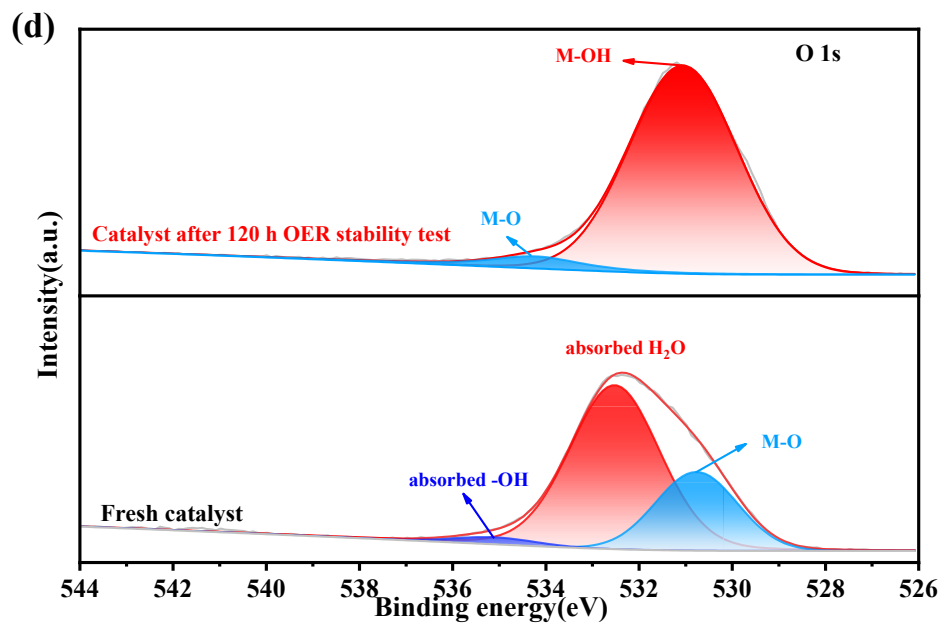

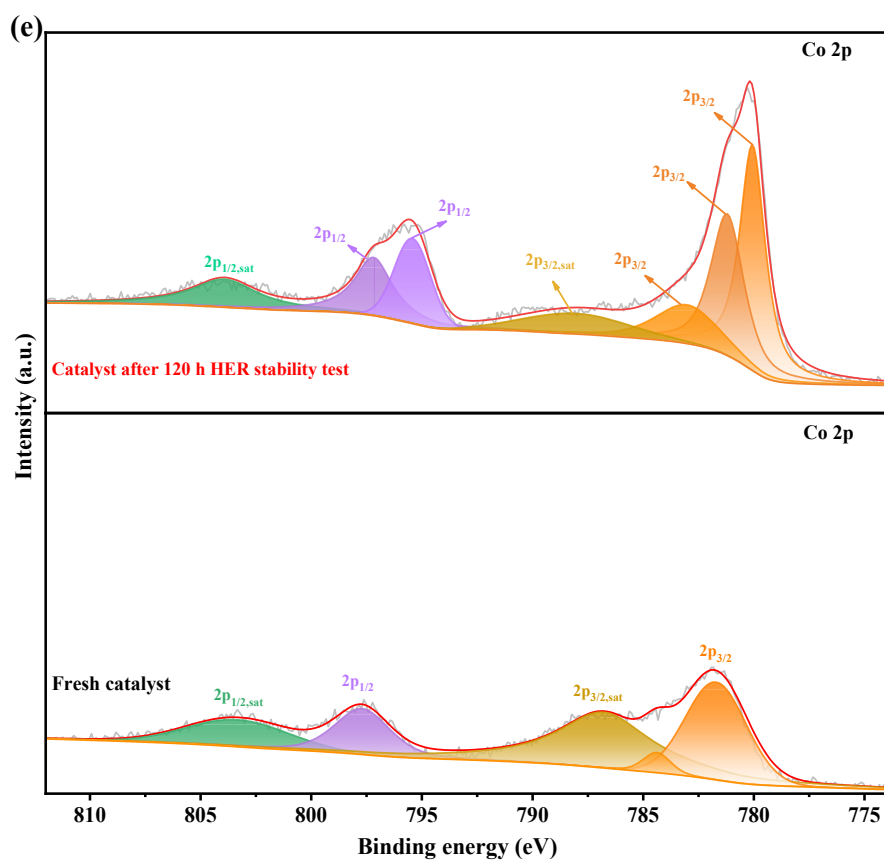

**Fig. S11** XPS spectra. High-resolution XPS of (a) XPS survey, and b-e high-resolution XPS of (b) Cu 2p, (c) Mo 3d, (d) O 1s, and (e) Co 2p of the CuMoO<sub>4</sub>@Co<sub>3</sub>O<sub>4</sub>/NF catalyst after 120 h HER stability tests.

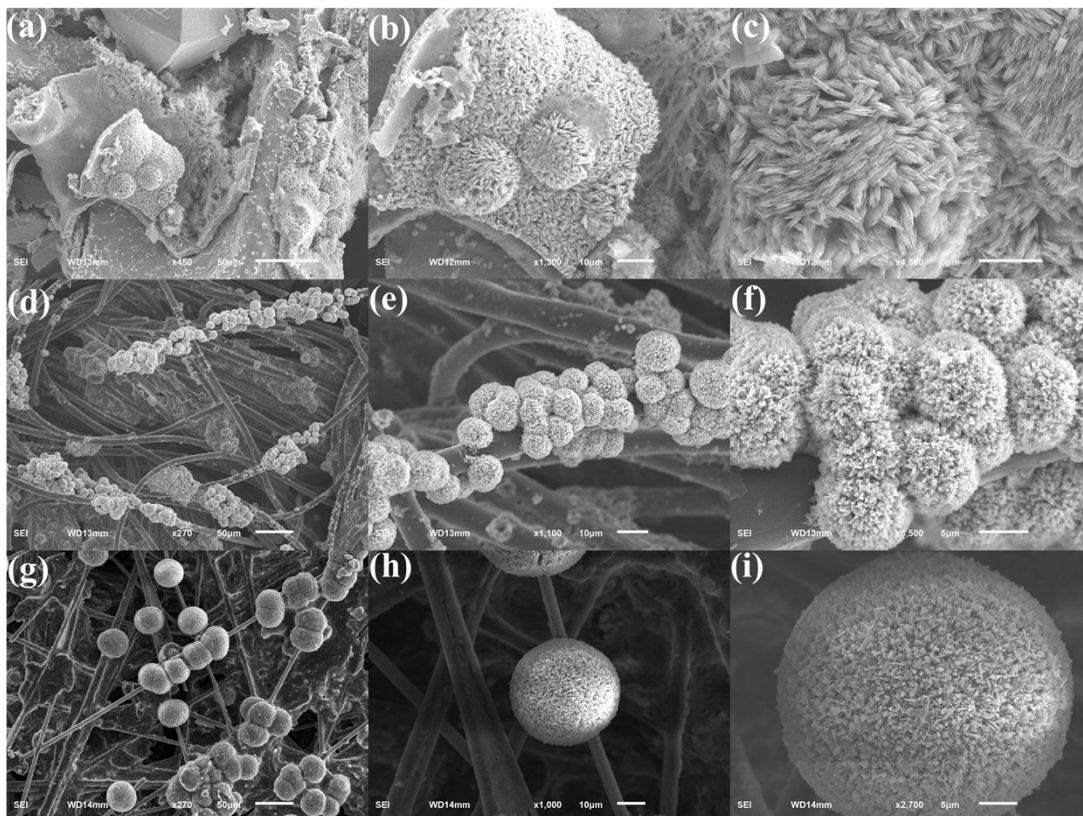

**Fig. S12** SEM pictures: (a-c)  $\text{CuMoO}_4@Co_3O_4/CF$ , (d-f)  $\text{CuMoO}_4@Co_3O_4/CC$  and (g-i)  $\text{CuMoO}_4@Co_3O_4/CP$ .

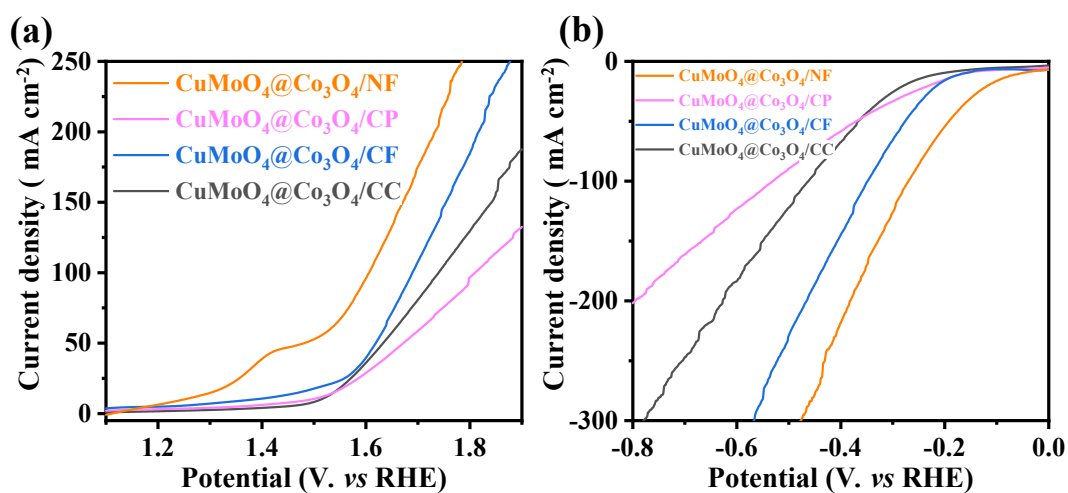

**Fig. S13** OER and HER activities of  $\text{CuMoO}_4@Co_3O_4$  catalysts prepared with different substrates in 1 mol L<sup>-1</sup> KOH.

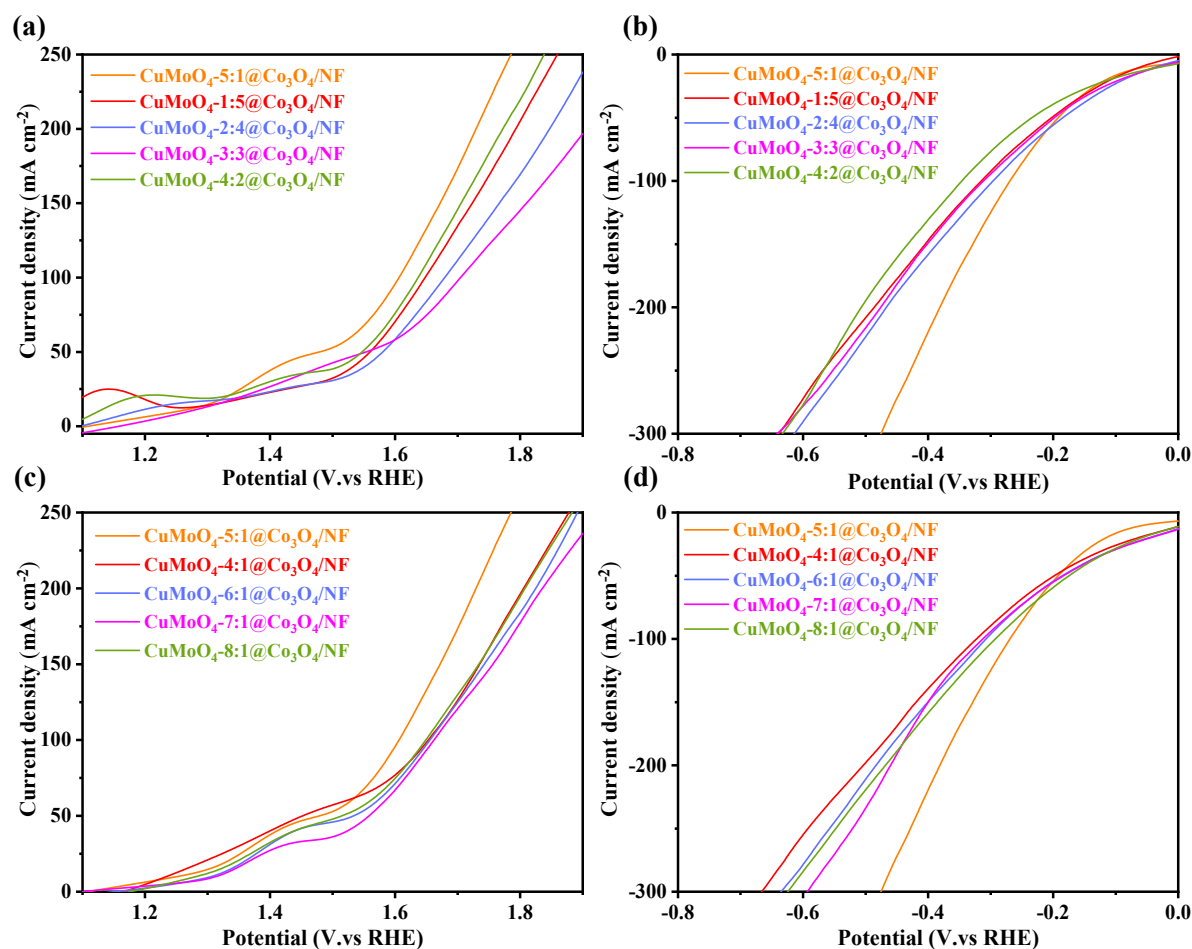

**Fig. S14** OER and HER activities of CuMoO<sub>4</sub>@Co<sub>3</sub>O<sub>4</sub>/NF catalysts prepared with different molar ratios of Cu and Mo in 1 mol L<sup>-1</sup> KOH.

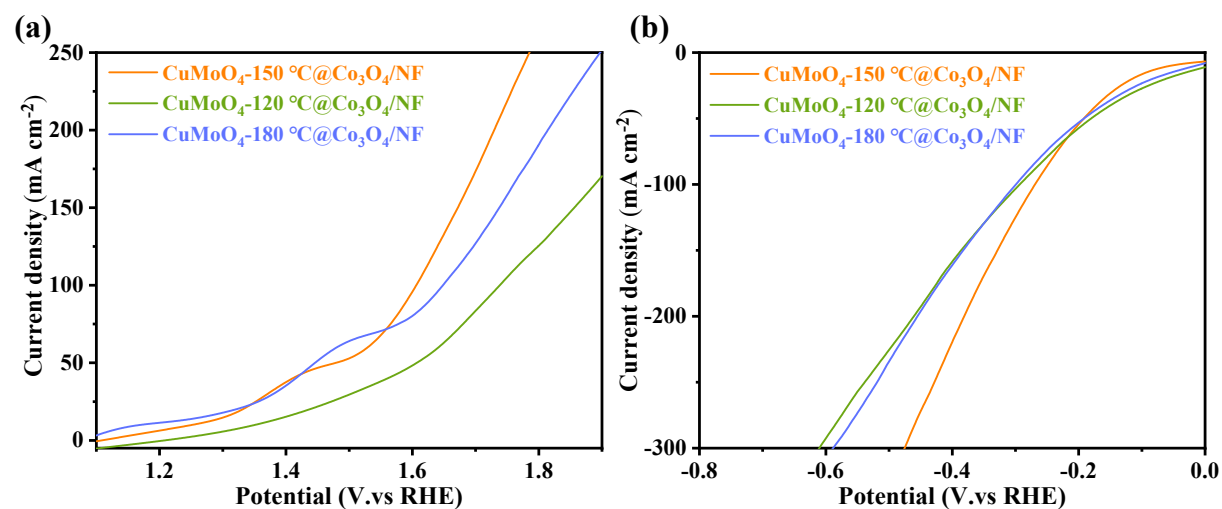



**Fig. S15** OER and HER activities of  $\text{CuMoO}_4@\text{Co}_3\text{O}_4/\text{NF}$  catalysts prepared from  $\text{CuMoO}_4/\text{NF}$  precursors at different synthesis temperatures in  $1 \text{ mol L}^{-1}$  KOH.

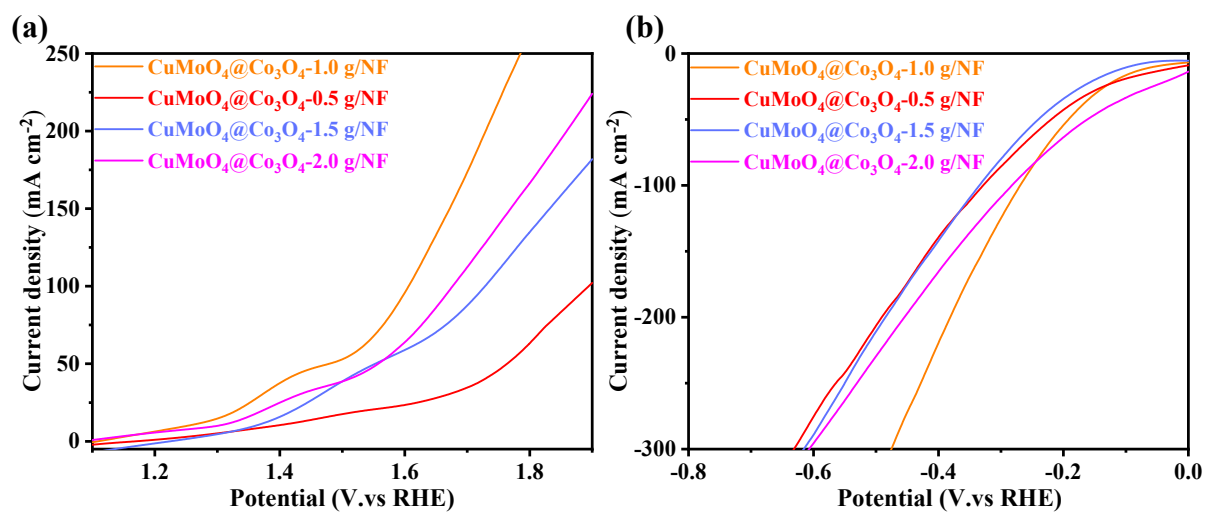

**Fig. S16** OER and HER activities of  $\text{CuMoO}_4@\text{Co}_3\text{O}_4/\text{NF}$  catalysts prepared with different masses of cobalt nitrate hexahydrate in  $1 \text{ mol L}^{-1}$  KOH.

**Table S1** The comparison of OER overpotentials of  $\text{CuMoO}_4@\text{Co}_3\text{O}_4/\text{NF}$  with other superior selected nonnoble catalysts.

| Catalyst                                         | Electrolyte                                             | $j$ ( $\text{mA cm}^{-2}$ ) | $\eta$ (mV) | Reference |
|--------------------------------------------------|---------------------------------------------------------|-----------------------------|-------------|-----------|
| $\text{CuMoO}_4@\text{Co}_3\text{O}_4/\text{NF}$ | $1 \text{ mol L}^{-1}$ KOH                              | 50                          | 251         | This work |
| Cu-MoS <sub>2</sub> -TS                          | $0.5 \text{ mol L}^{-1}$ H <sub>2</sub> SO <sub>4</sub> | 50                          | 273         | 2         |
| NiCuP                                            | $1 \text{ mol L}^{-1}$ KOH                              | 50                          | 300         | 3         |
| Co-CuO                                           | $1 \text{ mol L}^{-1}$ KOH                              | 50                          | 299         | 4         |
| Cu <sub>2</sub> S/C                              | $1 \text{ mol L}^{-1}$ KOH                              | 10                          | 410         | 5         |
| Cu <sub>3</sub> P/NF                             | $1 \text{ mol L}^{-1}$ KOH                              | 10                          | 290         | 6         |

|                      |                            |    |     |   |
|----------------------|----------------------------|----|-----|---|
| Co-P/Cu              | 1 mol L <sup>-1</sup> KOH  | 10 | 345 | 7 |
| MoO <sub>2</sub> /NF | 1 mol L <sup>-1</sup> KOH  | 10 | 250 | 8 |
| MoNi                 | 1 mol L <sup>-1</sup> NaOH | 10 | 290 | 9 |

**Table S2** The comparison of HER overpotentials of CuMoO<sub>4</sub>@Co<sub>3</sub>O<sub>4</sub>/NF with other superior selected nonnoble catalysts.

| Catalyst                                               | Electrolyte               | <i>j</i> (mA cm <sup>-2</sup> ) | <i>η</i> (mV) | Reference |
|--------------------------------------------------------|---------------------------|---------------------------------|---------------|-----------|
| CuMoO <sub>4</sub> @Co <sub>3</sub> O <sub>4</sub> /NF | 1 mol L <sup>-1</sup> KOH | -10                             | 54            | This work |
| Mo <sub>0.25</sub> Co <sub>0.75</sub> P                | 1 mol L <sup>-1</sup> KOH | -10                             | 59            | 10        |
| Au/CoP@NC-3                                            | 1 mol L <sup>-1</sup> KOH | -10                             | 140.9         | 11        |
| Cu/Mo <sub>2</sub> C/Mo <sub>2</sub> N                 | 1 mol L <sup>-1</sup> KOH | -10                             | 82            | 12        |
| Cu/Ni <sub>3</sub> S <sub>2</sub>                      | 1 mol L <sup>-1</sup> KOH | -10                             | 128           | 13        |
| Cu <sub>3</sub> N                                      | 1 mol L <sup>-1</sup> KOH | -10                             | 118           | 14        |
| Cu <sub>3</sub> P@NF                                   | 1 mol L <sup>-1</sup> KOH | -10                             | 105           | 15        |
| Mo <sub>2</sub> C                                      | 1 mol L <sup>-1</sup> KOH | -10                             | 130           | 16        |
| Cu <sub>2</sub> Se@NiFe-LDHNS                          | 1 mol L <sup>-1</sup> KOH | -10                             | 195           | 17        |
| RhCu                                                   | 1 mol L <sup>-1</sup> KOH | -10                             | 78            | 18        |
| Cu <sub>1</sub> Ni <sub>2</sub> -N                     | 1 mol L <sup>-1</sup> KOH | -10                             | 71            | 19        |
| Pt/CoSe                                                | 1 mol L <sup>-1</sup> KOH | -10                             | 58            | 20        |
| Co <sub>3</sub> Mo/MoO <sub>x</sub> /Ni                | 1 mol L <sup>-1</sup> KOH | -10                             | 68            | 21        |

**Table S3** Comparisons of overall water-splitting performance of  $\text{CuMoO}_4@\text{Co}_3\text{O}_4/\text{NF}$  with some recently reported catalysts in  $1.0 \text{ mol L}^{-1}$  KOH.

| Catalyst                                                                          | Support                    | <i>j</i><br>( $\text{mA cm}^{-2}$ ) | Voltage<br>(V) | Reference |
|-----------------------------------------------------------------------------------|----------------------------|-------------------------------------|----------------|-----------|
| $\text{CuMoO}_4@\text{Co}_3\text{O}_4/\text{NF}$ //                               | Ni Foam                    | 10                                  | 1.51           | This work |
| $\text{CuMoO}_4@\text{Co}_3\text{O}_4/\text{NF}$                                  |                            |                                     |                |           |
| $\text{Cu}_2\text{Se}@\text{NiFe-LDHNS}/\text{CF}$ //                             | Cu Foam                    | 10                                  | 1.667          | 17        |
| $\text{Cu}_2\text{Se}@\text{NiFe-LDHNS}/\text{CF}$                                |                            |                                     |                |           |
| $\text{CuO}_x \text{ NWs}@\text{NiMnO}_x \text{ NSs}/\text{CF}$ // $\text{CuO}_x$ | Cu Foam                    | 10                                  | 1.62           | 22        |
| $\text{NWs}@\text{NiMnO}_x \text{ NSs}/\text{CF}$                                 |                            |                                     |                |           |
| $\text{Cu}_2\text{S}@\text{Cu}$ // $\text{Cu}_2\text{S}@\text{Cu}$                | Cu Foam                    | 10                                  | 1.84           | 23        |
| $\text{Cu}_3\text{P}/\text{NF}$ // $\text{Cu}_3\text{P}/\text{NF}$                | Ni Foam                    | 10                                  | 1.67           | 15        |
| $\text{NiFe LDH}@\text{NiCoP}/\text{NF}$ //                                       | Ni Foam                    | 10                                  | 1.57           | 24        |
| $\text{NiFe LDH}@\text{NiCoP}/\text{NF}$                                          |                            |                                     |                |           |
| $\text{Cu}_3\text{N}$ // $\text{Cu}_3\text{N}$                                    | Ni Foam                    | 10                                  | 1.60           | 14        |
| $\text{Co}_3\text{S}_4/\text{MOF}$ // $\text{Co}_3\text{S}_4/\text{MOF}$          | Conductive<br>carbon cloth | 10                                  | 1.55           | 25        |
| $\text{CoFeZr oxides}$ // $\text{CoFeZr oxides}$                                  | Ni Foam                    | 10                                  | 1.63           | 26        |
| $\text{NiCo}_2\text{S}_4$ // $\text{NiCo}_2\text{S}_4$                            | Ni Foam                    | 10                                  | 1.58           | 27        |

**Table S4** The actual volume of H<sub>2</sub> collected by the drainage method and its associated Faradaic efficiency.

| <b>Time (s)</b> | <b><math>V_{\text{measured}}</math> (L)</b> | <b><math>V_{\text{calculated}}</math> (L)</b> | <b>FE (%)</b> |
|-----------------|---------------------------------------------|-----------------------------------------------|---------------|
| 600             | 0.0075                                      | 0.0076                                        | 98.5          |
| 1200            | 0.015                                       | 0.0152                                        | 98.5          |
| 1800            | 0.022                                       | 0.0229                                        | 96.3          |
| 2400            | 0.0295                                      | 0.0305                                        | 96.8          |
| 3000            | 0.0371                                      | 0.0381                                        | 97.4          |
| 3600            | 0.0447                                      | 0.0457                                        | 97.8          |
| 4200            | 0.0522                                      | 0.0533                                        | 97.9          |
| 4800            | 0.06                                        | 0.0609                                        | 98.5          |
| 5400            | 0.0675                                      | 0.0686                                        | 98.5          |
| 6000            | 0.075                                       | 0.0762                                        | 98.5          |
| 6600            | 0.0832                                      | 0.0838                                        | 99.3          |

**Table S5** The actual volume of O<sub>2</sub> collected by the drainage method and its associated Faradaic efficiency.

| <b>Time (s)</b> | <b><math>V_{\text{measured}}</math> (L)</b> | <b><math>V_{\text{calculated}}</math> (L)</b> | <b>FE (%)</b> |
|-----------------|---------------------------------------------|-----------------------------------------------|---------------|
| 600             | 0.0036                                      | 0.0038                                        | 94.5          |
| 1200            | 0.007                                       | 0.0076                                        | 91.9          |
| 1800            | 0.0105                                      | 0.0114                                        | 91.9          |
| 2400            | 0.0143                                      | 0.0152                                        | 93.9          |
| 3000            | 0.0183                                      | 0.0190                                        | 96.1          |
| 3600            | 0.0223                                      | 0.0229                                        | 97.6          |
| 4200            | 0.0262                                      | 0.0267                                        | 98.3          |
| 4800            | 0.0302                                      | 0.0305                                        | 99.1          |
| 5400            | 0.0341                                      | 0.0343                                        | 99.5          |
| 6000            | 0.038                                       | 0.0381                                        | 99.8          |
| 6600            | 0.0415                                      | 0.0419                                        | 99.1          |

## Notes and references

- 1 Z. Abdi, M. Vandichel, A. S. Sologubenko, M.-G. Willinger, J.-R. Shen, S. I. Allakhverdiev and M. M. Najafpour, *Int. J. Hydrogen Energy*, 2021, **46**, 37774-37781.
- 2 M. D. Sharma, C. Mahala, B. Modak, S. Pande and M. Basu, *Langmuir*, 2021, **37**, 4847-4858.
- 3 L. Wei, K. Goh, O. Birer, H. E. Karahan, J. Chang, S. Zhai, X. Chen and Y. Chen, *Nanoscale*, 2017, **9**, 4401-4408.
- 4 X. Xiong, C. You, Z. Liu, A. M. Asiri and X. Sun, *ACS Sustainable Chem. Eng.*, 2018, **6**, 2883-2887.
- 5 X. Zhao, L. Liu, Y. Zhang, H. Zhang and Y. Wang, *Nanotechnol.*, 2017, **28**, 345402.
- 6 J. Hao, W. Yang, Z. Huang and C. Zhang, *Adv. Mater. Interfaces*, 2016, **3**, 1600236.
- 7 N. Jiang, B. You, M. Sheng and Y. Sun, *Angew. Chem. Int. Ed. Engl.*, 2015, **54**, 6251-6254.
- 8 Y. Jin, H. Wang, J. Li, X. Yue, Y. Han, P. K. Shen and Y. Cui, *Adv. Mater.*, 2016, **28**, 3785-3790.
- 9 J.M. Jaks'ic' a, M.V. Vojnovic' b , N.V. Krstajic' b, *Electrochim. Acta.*, 2000, **45**, 4151-4158.
- 10 Y. Zhang, Z. Wang, F. Du, H. He, A. Alsaedi, T. Hayat, T. Li, G.-L. Li, Y. Zhou and Z. Zou, *J. Mater. Chem. A*, 2019, **7**, 14842-14848.
- 11 X. Wang, Y. Fei, W. Li, L. Yi, B. Feng, Y. Pan, W. Hu and C. M. Li, *ACS Appl. Mater. Interfaces*, 2020, **12**, 16548-16556.
- 12 R. Kumar, Z. Ahmed, H. Kaur, C. Bera and V. Bagchi, *Catal. Sci. Technol.*, 2020, **10**, 2213-2220.

- 13 J. X. Feng, J. Q. Wu, Y. X. Tong and G. R. Li, *J Am. Chem. Soc.*, 2018, **140**, 610-617.
- 14 C. Panda, P. W. Menezes, M. Zheng, S. Orthmann and M. Driess, *ACS Energy Lett.*, 2019, **4**, 747-754.
- 15 A. Han, H. Zhang, R. Yuan, H. Ji and P. Du, *ACS Appl. Mater. Interfaces*, 2017, **9**, 2240-2248.
- 16 L. Liao, S. Wang, J. Xiao, X. Bian, Y. Zhang, M. D. Scanlon, X. Hu, Y. Tang, B. Liu and H. H. Girault, *Energy Environ. Sci.*, 2014, **7**, 387-392.
- 17 H. Qi, P. Zhang, H. Wang, Y. Cui, X. Liu, X. She, Y. Wen and T. Zhan, *J. Colloid Interface Sci.*, 2021, **599**, 370-380.
- 18 D. Cao, H. Xu and D. Cheng, *Adv. Energy Mater.*, 2020, **10**, 1903038.
- 19 Z. Wang, L. Xu, F. Huang, L. Qu, J. Li, K. A. Owusu, Z. Liu, Z. Lin, B. Xiang, X. Liu, K. Zhao, X. Liao, W. Yang, Y. B. Cheng and L. Mai, *Adv. Energy Mater.*, 2019, **9**, 1900390.
- 20 K. Jiang, B. Liu, M. Luo, S. Ning, M. Peng, Y. Zhao, Y. R. Lu, T. S. Chan, F. M. F. de Groot and Y. Tan, *Nat. Commun.*, 2019, **10**, 1743-1752.
- 21 J. Chen, Y. Ge, Q. Feng, P. Zhuang, H. Chu, Y. Cao, W. R. Smith, P. Dong, M. Ye and J. Shen, *ACS Appl. Mater. Interfaces*, 2019, **11**, 9002-9010.
- 22 S. Sirisomboonchai, X. Li, N. Kitiphatpiboon, R. Channoo, S. Li, Y. Ma, S. Kongparakul, C. Samart, A. Abudula and G. Guan, *J. Mater. Chem. A*, 2020, **8**, 16463-16476.
- 23 B. Ma, Z. Yang, Z. Yuan and Y. Chen, *Int. J. Hydrogen Energy*, 2019, **44**, 1620-1626.
- 24 Y. Li, Y. Sun, Y. Qin, W. Zhang, L. Wang, M. Luo, H. Yang and S. Guo, *Adv. Energy Mater.*, 2020, **10**, 1903120.
- 25 T. Liu, P. Li, N. Yao, T. Kong, G. Cheng, S. Chen and W. Luo, *Adv. Mater.*, 2019, **31**, e1806672.

- 26 L. Huang, D. Chen, G. Luo, Y. R. Lu, C. Chen, Y. Zou, C. L. Dong, Y. Li and S. Wang, *Adv. Mater.*, 2019, **31**, e1901439.
- 27 Z. Kang, H. Guo, J. Wu, X. Sun, Z. Zhang, Q. Liao, S. Zhang, H. Si, P. Wu, L. Wang and Y. Zhang, *Adv. Funct. Mater.*, 2019, **29**, 1807031.
